# Supplementary material for: Linear and three-arm star hydroxytelechelic poly(benzyl β-malolactonate)s: a straightforward one-step synthesis through ring-opening polymerization
Source: Royal Society of Chemistry journal article supplement (doi:10.1039/c5py00724k), 2015-01-01
Supplement: c5py00724k1.pdf [file c5py00724k1.pdf]

## Electronic Supplementary Information

### **Linear and Three-arm Star Hydroxytelechelic Poly(Benzyl $\beta$ -Malolactonate)s: A Straightforward One-step Synthesis through Ring-Opening Polymerization**

Ghislaine Barouti,<sup>§</sup> Cédric G. Jaffredo,<sup>§</sup> and Sophie M. Guillaume\*

Institut des Sciences Chimiques de Rennes, UMR 6226 CNRS - Université de Rennes 1,  
Campus de Beaulieu, F-35042 Rennes Cedex, France

---

<sup>§</sup> Equally contributing first authors

\* Corresponding author: [sophie.guillaume@univ-rennes1.fr](mailto:sophie.guillaume@univ-rennes1.fr)

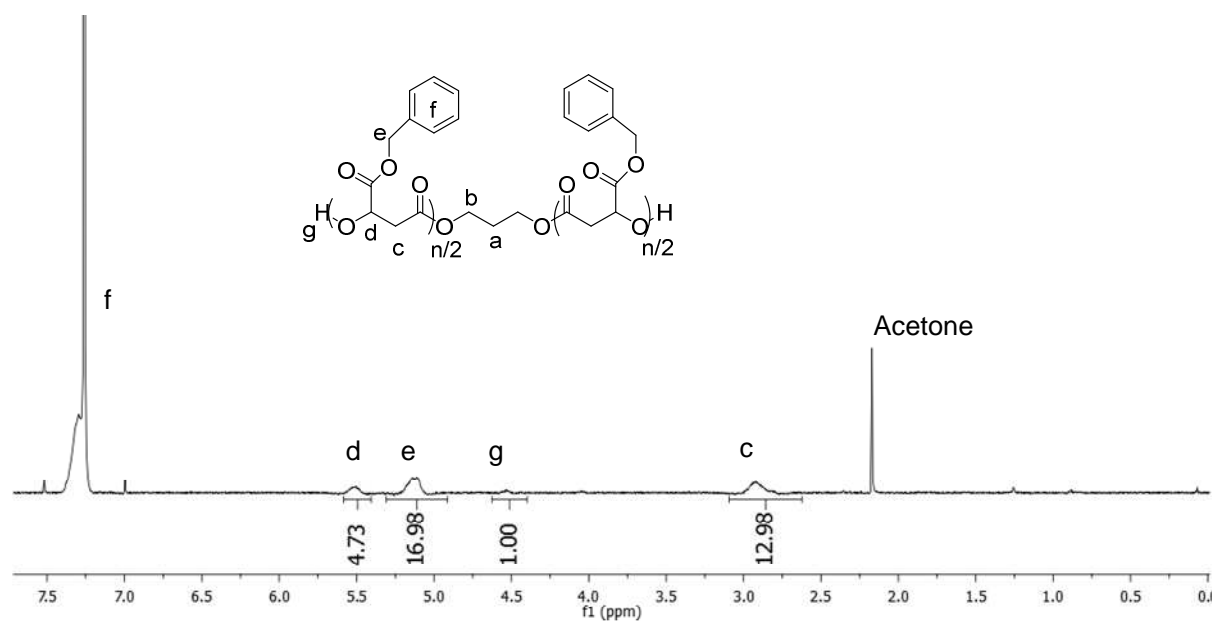

**Figure S1.**  $^1\text{H}$  NMR spectrum ( $\text{CDCl}_3$ , 400 MHz, 25 °C) of a PMLA<sup>Be</sup> diol synthesized by ROP of MLA<sup>Be</sup> catalyzed by  $\text{Bi}(\text{OTf})_3$  in presence of 5 equiv. of 1,3-propane diol as initiator (Table 1, entry 2).

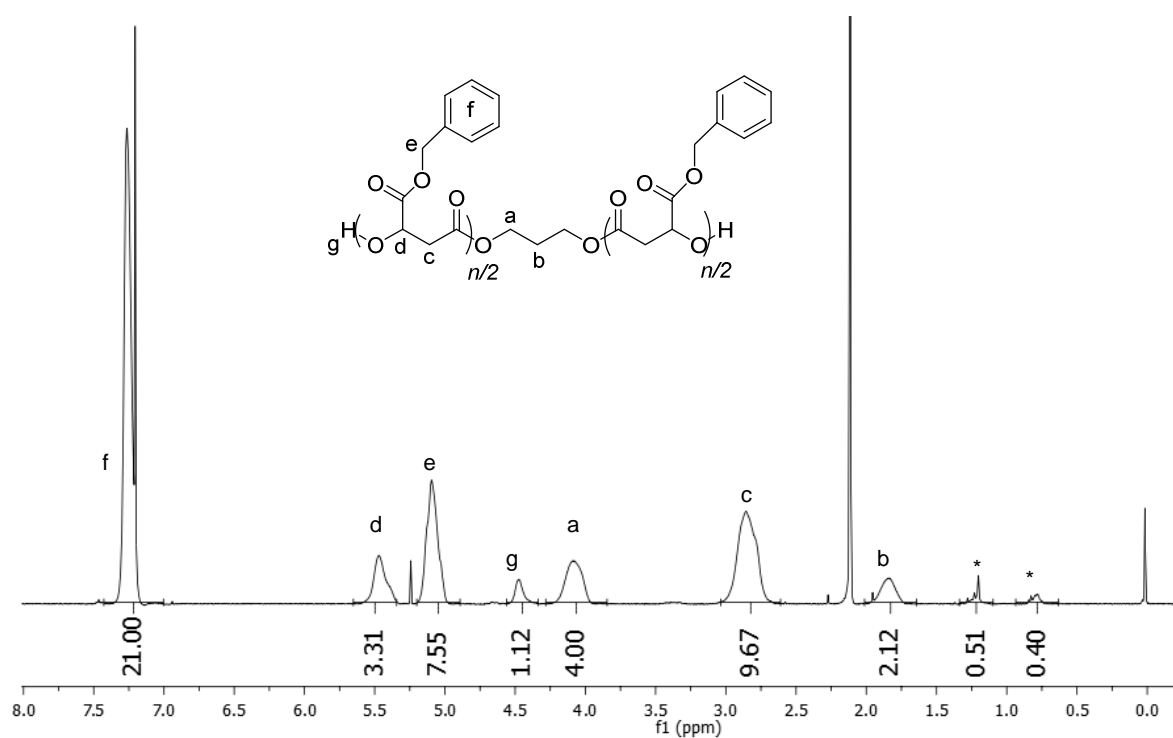

**Figure S2.**  $^1\text{H}$  NMR spectrum ( $\text{CDCl}_3$ , 400 MHz, 25 °C) of a PMLA<sup>Be</sup> diol synthesized by ROP of MLA<sup>Be</sup> catalyzed by MSA in presence of 5 equiv. of 1,3-propane diol as initiator (Table 1, entry 13).
